# Supplementary material
Source: MDPI journal article supplement (https://www.mdpi.com/search?q=water-12-02187)
Supplement: s001 [file water-12-02187-s001.pdf]

Table S1. Pathogenic bacteria in groundwater sampling locations in the Kelani river basin (Dry season).

| Well | Water              | TC (CFU/100mL) | FC (CFU/100mL) | <i>Pseudomonas</i> . spp. | Other | <i>Salmonella</i> spp. | <i>Campylobacter</i> spp. | <i>Shigella</i> spp. | Pathogenic bacteria                            |
|------|--------------------|----------------|----------------|---------------------------|-------|------------------------|---------------------------|----------------------|------------------------------------------------|
| 1    | Wana male          | 21             | 0              | 200<                      | 0     | Negative               | Negative                  | Negative             |                                                |
| 2    | Norwood            | 0              | 0              | 4                         | 0     | Negative               | Negative                  | Negative             |                                                |
| 3    | Lakham             | 200<           | 17             | 200<                      | 7     | Negative               | Negative                  | Negative             |                                                |
| 4    | Koththellena 1     | 200<           | 8              | 200<                      | 0     | Negative               | Negative                  | Negative             |                                                |
| 5    | Kalaweldeniya      | 200<           | 6              | 200<                      | 0     | Negative               | Negative                  | Negative             |                                                |
| 6    | Bokarabevila       | 23             | 10             | 200<                      | 0     | Negative               | Negative                  | Negative             |                                                |
| 7    | Malalpola          | 25             | 3              | 200<                      | 3     | Negative               | Negative                  | Negative             |                                                |
| 8    | Pitagaldeniya      | 200<           | 0              | 0                         | 0     | Negative               | Negative                  | Negative             |                                                |
| 9    | Deraniyagala       | 200<           | 0              | 0                         | 0     | Negative               | Negative                  | Negative             |                                                |
| 10   | Waga               | 200<           | 4              | 200<                      | 0     | Negative               | Negative                  | Negative             |                                                |
| 11   | Tientsin           | 200<           | 1              | 200<                      | 0     | Negative               | Negative                  | Negative             |                                                |
| 12   | Samimale           | 200<           | 11             | 0                         | 0     | Negative               | Negative                  | Negative             |                                                |
| 13   | Maskeliya          | 200<           | 200<           | 80                        | 0     | Negative               | Negative                  | Negative             |                                                |
| 14   | Dicoya             | 200<           | 0              | 0                         | 0     | Negative               | Negative                  | Negative             |                                                |
| 15   | Norton-Castlereigh | 200<           | 200<           | 0                         | 0     | Negative               | Negative                  | Negative             |                                                |
| 16   | Norton junction    | 10             | 4              | 200<                      | 50    | Negative               | Negative                  | Negative             |                                                |
| 17   | Athis              | 200<           | 15             | 200<                      | 0     | Negative               | Negative                  | Negative             |                                                |
| 18   | Koththellena 2     | 200<           | 200<           | 0                         | 0     | Negative               | Negative                  | Negative             |                                                |
| 19   | Ginigathhena       | 200<           | 200<           | 200<                      | 0     | Negative               | Positive                  | Negative             | <i>Campylobacter</i> spp.                      |
| 20   | Badupola           | 200<           | 7              | 200<                      | 0     | Negative               | Negative                  | Negative             |                                                |
| 21   | Kalugala           | 200<           | 200<           | 0                         | 0     | Negative               | Negative                  | Negative             |                                                |
| 22   | Gonagamuwa         | 200<           | 7              | 200<                      | 0     | Negative               | Negative                  | Negative             |                                                |
| 23   | Bulathkohupitiya   | 200<           | 27             | 0                         | 0     | Positive               | Negative                  | Negative             | <i>Salmonella enterica</i> serovar Weltevreden |
| 24   | Thoranakada        | 200<           | 0              | 0                         | 0     | Negative               | Negative                  | Negative             |                                                |
| 25   | Thaligama          | 200<           | 200<           | 0                         | 0     | Negative               | Negative                  | Negative             |                                                |
| 26   | Kotiyakumbura      | 200<           | 30             | 0                         | 0     | Negative               | Negative                  | Negative             |                                                |
| 27   | Warawala           | 200<           | 16             | 0                         | 0     | Negative               | Negative                  | Negative             |                                                |
| 28   | Kabulumulla        | 200<           | 4              | 2                         | 0     | Negative               | Negative                  | Negative             |                                                |
| 29   | Kahanavita         | 200<           | 200<           | 200<                      | 0     | Positive               | Negative                  | Negative             | <i>Salmonella enterica</i> serovar Kentucky    |
| 30   | Kudagama           | 200<           | 0              | 0                         | 0     | Negative               | Negative                  | Negative             |                                                |
| 31   | Kananpella         | 200<           | 200<           | 200<                      | 200<  | Positive               | Negative                  | Negative             | <i>Salmonella enterica</i> serovar Vancouver   |
| 32   | Akarawita          | 200<           | 50             | 200<                      | 0     | Negative               | Negative                  | Negative             |                                                |
| 33   | Kahatapitiya       | 50             | 1              | 50                        | 0     | Negative               | Negative                  | Negative             |                                                |
| 34   | Kaluaggala         | 200<           | 0              | 200<                      | 200<  | Negative               | Negative                  | Negative             |                                                |
| 35   | Kelani waththa     | 200<           | 30             | 200<                      | 0     | Negative               | Negative                  | Negative             |                                                |
| 36   | Levent             | 25             | 5              | 200<                      | 10    | Positive               | Negative                  | Negative             | <i>Salmonella enterica</i> serovar Angoda      |
| 37   | Siyabalawa         | 200<           | 200<           | 0                         | 0     | Negative               | Negative                  | Negative             |                                                |

Table S2 Pathogenic bacteria in groundwater sampling locations in the Kelani river basin (Dry season).

| Well Water            | TC (CFU/100mL) | FC (CFU/100mL) | <i>Pseudomonas.spp.</i> | Other | <i>Salmonella spp.</i> | <i>Campylobacter spp.</i> | <i>Shigella spp.</i> | <i>Pathogenic bacteria</i>                                                                                                    |
|-----------------------|----------------|----------------|-------------------------|-------|------------------------|---------------------------|----------------------|-------------------------------------------------------------------------------------------------------------------------------|
| 38 Karawanaella       | 200<           | 200<           | 30                      | 0     | Positive               | Negative                  | Negative             | <i>Salmonella enterica</i> subsp <i>indica</i> str 6,14,25:a: enx/ <i>Salmonella enterica</i> subsp. <i>diarizonae</i> Ser.61 |
| 39 Nawagammane        | 200<           | 200<           | 0                       | 0     | Negative               | Negative                  | Negative             |                                                                                                                               |
| 40 Batangala          | 200<           | 2              | 200<                    | 0     | Negative               | Negative                  | Negative             |                                                                                                                               |
| 41 Getaheththa        | 70             | 6              | 200<                    | 0     | Negative               | Negative                  | Negative             |                                                                                                                               |
| 42 Puwakpitiya        | 200<           | 200<           | 200<                    | 0     | Negative               | Negative                  | Negative             |                                                                                                                               |
| 43 Hingurala          | 200<           | 3              | 0                       | 0     | Positive               | Negative                  | Negative             | <i>Salmonella enterica</i> serovar Poona                                                                                      |
| 44 Kosgama            | 200<           | 19             | 50                      | 0     | Negative               | Negative                  | Negative             |                                                                                                                               |
| 45 Vihara kumbura     | 200<           | 16             | 10                      | 200<  | Positive               | Negative                  | Negative             | <i>Salmonella enterica</i> serovar Waycross                                                                                   |
| 46 Kiridiwela-Delgoda | 200<           | 200<           | 20                      | 0     | Negative               | Negative                  | Negative             |                                                                                                                               |
| 47 Pinnawala          | 200<           | 1              | 5                       | 0     | Negative               | Negative                  | Negative             |                                                                                                                               |
| 48 lunugama           | 200<           | 2              | 3                       | 0     | Negative               | Negative                  | Negative             |                                                                                                                               |
| 49 Pollaththawela     | 200<           | 1              | 200<                    | 1     | Negative               | Negative                  | Negative             |                                                                                                                               |
| 50 Ranala             | 200<           | 11             | 20                      | 0     | Negative               | Negative                  | Negative             |                                                                                                                               |
| 51 Pahala bomariya    | 200<           | 200<           | 0                       | 0     | Negative               | Negative                  | Negative             |                                                                                                                               |
| 52 Biyagama           | 200<           | 8              | 200<                    | 0     | Positive               | Negative                  | Negative             | <i>Salmonella enterica</i> serovar Weltevreden                                                                                |
| 53 Bollagala          | 200<           | 15             | 0                       | 0     | Negative               | Negative                  | Negative             |                                                                                                                               |
| 54 Kohila waththa     | 200<           | 4              | 200<                    | 0     | Negative               | Negative                  | Negative             |                                                                                                                               |
| 55 Kelaniya           | 200<           | 2              | 200<                    | 0     | Negative               | Negative                  | Negative             | <i>Campylobacter spp.</i>                                                                                                     |
| 56 Pilapitiya         | 200<           | 19             | 0                       | 0     | Negative               | Negative                  | Negative             |                                                                                                                               |
| 57 Paliyagoda         | 200<           | 21             | 0                       | 0     | Negative               | Negative                  | Negative             |                                                                                                                               |
| 58 Aliwaththa         | 200<           | 200<           | 0                       | 0     | Negative               | Negative                  | Negative             |                                                                                                                               |
| 59 Palugama           | 200<           | 0              | 0                       | 0     | Negative               | Negative                  | Negative             |                                                                                                                               |
| 60 Moragahahena       | 200<           | 200<           | 0                       | 0     | Positive               | Negative                  | Negative             | <i>Salmonella enterica</i> serovar Kentucky                                                                                   |
| 61 Dekatana           | 200<           | 20             | 0                       | 0     | Negative               | Negative                  | Negative             |                                                                                                                               |
| 62 Godagama           | 200<           | 0              | 5                       | 0     | Negative               | Negative                  | Negative             |                                                                                                                               |
| 63 Udupila            | 200<           | 22             | 30                      | 0     | Negative               | Negative                  | Negative             |                                                                                                                               |
| 64 Hokandara          | 200<           | 200<           | 0                       | 0     | Negative               | Negative                  | Negative             |                                                                                                                               |
| 65 Arangala           | 200<           | 200<           | 0                       | 0     | Positive               | Negative                  | Negative             | <i>Salmonella enterica</i> serovar Mbandaka                                                                                   |
| 66 Mawaramandiya      | 5              | 0              | 200<                    | 30    | Negative               | Negative                  | Negative             |                                                                                                                               |
| 67 Thalangama         | 0              | 0              | 200<                    | 2     | Negative               | Negative                  | Negative             |                                                                                                                               |
| 68 Ederamulla         | 200<           | 33             | 5                       | 0     | Negative               | Negative                  | Negative             |                                                                                                                               |
| 69 IDH                | 2              | 0              | 50                      | 0     | Negative               | Negative                  | Negative             |                                                                                                                               |
| 70 Nawagampura        | 100            | 80             | 200<                    | 10    | Positive               | Negative                  | Negative             | <i>Salmonella enterica</i> serovar Typhimurium                                                                                |
| 71 Mahawaththa        | 200<           | 200<           | 0                       | 0     | Negative               | Negative                  | Negative             |                                                                                                                               |
| 72 Bangalawaththa     | 200<           | 200<           | 3                       | 0     | Positive               | Negative                  | Negative             | <i>Salmonella enterica</i> subsp <i>indica</i> str 6,14,25:a: enx                                                             |

Table S3 Pathogenic bacteria in groundwater sampling locations in the Kelani river basin (Wet season).

| Well Water  | TC (CFU/100mL) | FC (CFU/100mL) | <i>Pseudomonas.spp.</i> | Other | <i>Salmonella spp.</i> | <i>Campylobacter spp.</i> | <i>Shigella spp.</i> | <i>Pathogenic bacteria</i> |
|-------------|----------------|----------------|-------------------------|-------|------------------------|---------------------------|----------------------|----------------------------|
| 1 Wana male | 55             | 0              | 42                      | 0     | Negative               | Negative                  | Negative             |                            |
| 2 Norwood   | 200<           | 0              | 200<                    | 0     | Negative               | Negative                  | Negative             |                            |
| 3 Lakham    | 200<           | 31             | 200<                    | 0     | Negative               | Negative                  | Negative             |                            |

|    |                    |      |      |      |      |          |          |          |                                                             |
|----|--------------------|------|------|------|------|----------|----------|----------|-------------------------------------------------------------|
| 4  | Koththellena 1     | 200< | 24   | 0    | 0    | Negative | Negative | Negative |                                                             |
| 5  | Kalaweldeniya      | 200< | 200< | 0    | 0    | Negative | Negative | Negative |                                                             |
| 6  | Bokarabevila       | 20   | 3    | 200< | 1    | Negative | Negative | Negative |                                                             |
| 7  | Malalpola          | 15   | 3    | 200< | 0    | Negative | Negative | Negative |                                                             |
| 8  | Pitagaldeniya      | 200< | 200< | 0    | 0    | Negative | Negative | Negative |                                                             |
| 9  | Deraniyagala       | 102  | 12   | 200< | 0    | Negative | Negative | Negative |                                                             |
| 10 | Waga               | 200< | 0    | 0    | 0    | Negative | Negative | Negative |                                                             |
| 11 | Tientsin           | 200< | 4    | 200< | 0    | Negative | Negative | Negative |                                                             |
| 12 | Samimale           | 200< | 200< | 0    | 0    | Negative | Negative | Negative |                                                             |
| 13 | Maskeliya          | 200< | 200< | 0    | 0    | Positive | Negative | Negative | <i>Salmonella enterica</i> subsp.diarizonae str. 61 1v1,5,7 |
| 14 | Dicoya             | 200< | 4    | 0    | 0    | Negative | Negative | Negative |                                                             |
| 15 | Norton-Castlereigh | 200< | 200< | 0    | 0    | Negative | Negative | Negative |                                                             |
| 16 | Norton junction    | 0    | 0    | 50   | 3    | Negative | Negative | Negative |                                                             |
| 17 | Athis              | 200< | 5    | 20   | 2    | Negative | Negative | Negative |                                                             |
| 18 | Koththellena 2     | 200< | 200< | 0    | 0    | Positive | Negative | Negative | <i>Salmonella enterica</i> subsp.diarizonae str. 61 1v1,5,7 |
| 19 | Ginigathhena       | 200< | 200< | 0    | 0    | Negative | Negative | Negative |                                                             |
| 20 | Badupola           | 200< | 200< | 0    | 0    | Positive | Negative | Negative | <i>Salmonella enterica</i> serovar Typhimurium              |
| 21 | Kalugala           | 200< | 200< | 0    | 0    | Negative | Negative | Negative |                                                             |
| 22 | Gonagamuwa         | 200< | 22   | 200< | 200< | Negative | Negative | Negative |                                                             |
| 23 | Bulathkohupitiya   | 200< | 31   | 200< | 0    | Negative | Negative | Negative |                                                             |
| 24 | Thoranakada        | 200< | 2    | 200< | 0    | Negative | Negative | Negative |                                                             |
| 25 | Thaligama          | 200< | 200< | 0    | 0    | Negative | Negative | Negative |                                                             |
| 26 | Kotiyakumbura      | 200< | 26   | 0    | 0    | Negative | Negative | Negative |                                                             |
| 27 | Warawala           | 200< | 200< | 0    | 0    | Negative | Negative | Negative |                                                             |
| 28 | Kabulumulla        | 200< | 31   | 200< | 0    | Positive | Negative | Negative | <i>Salmonella enterica</i> serovar Corvallis                |
| 29 | Kahanavita         | 200< | 6    | 200< | 0    | Negative | Negative | Negative |                                                             |
| 30 | Kudagama           | 200< | 200< | 0    | 0    | Negative | Negative | Negative |                                                             |
| 31 | Kananpella         | 100  | 2    | 200< | 200< | Negative | Negative | Negative |                                                             |
| 32 | Akarawita          | 200< | 9    | 200< | 200< | Negative | Negative | Negative |                                                             |
| 33 | Kahatapitiya       | 200< | 0    | 200< | 0    | Negative | Negative | Negative |                                                             |
| 34 | Kaluaggala         | 200< | 17   | 5    | 0    | Negative | Negative | Negative |                                                             |
| 35 | Kelani waththa     | 200< | 6    | 50   | 0    | Negative | Negative | Negative |                                                             |
| 36 | Levent             | 30   | 14   | 200< | 0    | Negative | Negative | Negative |                                                             |
| 37 | Siyabalawa         | 200< | 1    | 200< | 0    | Negative | Negative | Negative |                                                             |

Table S4 Pathogenic bacteria in groundwater sampling locations in the Kelani river basin (Wet season).

| Well Water | TC (CFU/100mL) | FC (CFU/100mL) | <i>Pseudomonas.spp.</i> | Other | <i>Salmonella spp.</i> | <i>Campylobacter spp.</i> | <i>Shigella spp.</i> | Pathogenic bacteria |
|------------|----------------|----------------|-------------------------|-------|------------------------|---------------------------|----------------------|---------------------|
| 38         | Karawanaella   | 200<           | 8                       | 200<  | 200<                   | Negative                  | Negative             | Negative            |
| 39         | Nawagammane    | 200<           | 0                       | 200<  | 0                      | Negative                  | Negative             | Negative            |
| 40         | Batangala      | 200<           | 7                       | 200<  | 0                      | Negative                  | Negative             | Negative            |
| 41         | Getaheththa    | 30             | 23                      | 200<  | 0                      | Negative                  | Negative             | Negative            |
| 42         | Puwakpitiya    | 200<           | 20                      | 0     | 0                      | Negative                  | Negative             | Negative            |
| 43         | Hingurala      | 200<           | 1                       | 0     | 0                      | Positive                  | Negative             | Negative            |
| 44         | Kosgama        | 200<           | 200<                    | 200<  | 0                      | Negative                  | Negative             | Negative            |

*Salmonella enterica* serovar Newport

|    |                    |      |      |      |      |          |          |          |                                             |
|----|--------------------|------|------|------|------|----------|----------|----------|---------------------------------------------|
| 45 | Vihara kumbura     | 200< | 15   | 0    | 0    | Negative | Negative | Negative | <i>Salmonella enterica</i> serovar Kentucky |
| 46 | Kiridiwela-Delgoda | 200< | 200< | 200< | 0    | Positive | Negative | Negative |                                             |
| 47 | Pinnawala          | 200< | 6    | 200< | 0    | Negative | Negative | Negative |                                             |
| 48 | lunugama           | 200< | 7    | 0    | 0    | Negative | Negative | Negative |                                             |
| 49 | Pollaththawela     | 200< | 2    | 200< | 0    | Negative | Negative | Negative |                                             |
| 50 | Ranala             | 200< | 200< | 0    | 0    | Negative | Negative | Negative |                                             |
| 51 | Pahala bomariya    | 200< | 8    | 200< | 200< | Negative | Negative | Negative |                                             |
| 52 | Biyagama           | 200< | 150  | 200< | 0    | Negative | Negative | Negative |                                             |
| 53 | Bollagala          | 200< | 21   | 10   | 0    | Negative | Negative | Negative |                                             |
| 54 | Kohila waththa     | 100  | 2    | 200< | 200< | Negative | Negative | Negative |                                             |
| 55 | Kelaniya           | 200< | 50   | 20   | 0    | Negative | Negative | Negative |                                             |
| 56 | Pilapitiya         | 200< | 200< | 200< | 0    | Negative | Negative | Negative |                                             |
| 57 | Paliyagoda         | 200< | 150  | 0    | 0    | Negative | Negative | Negative |                                             |
| 58 | Aliwaththa         | 200< | 200< | 0    | 0    | Negative | Negative | Negative |                                             |
| 59 | Palugama           | 200< | 3    | 0    | 0    | Negative | Negative | Negative |                                             |
| 60 | Moragahahena       | 200< | 200< | 3    | 0    | Negative | Negative | Negative |                                             |
| 61 | Dekatana           | 200< | 11   | 0    | 0    | Negative | Negative | Negative |                                             |
| 62 | Godagama           | 0    | 0    | 4    | 0    | Negative | Negative | Negative |                                             |
| 63 | Udupila            | 200< | 35   | 200< | 0    | Negative | Negative | Negative |                                             |
| 64 | Hokandara          | 100  | 6    | 200< | 0    | Negative | Negative | Negative |                                             |
| 65 | Arangala           | 200< | 110  | 15   | 0    | Negative | Negative | Negative |                                             |
| 66 | Mawaramandiya      | 200< | 50   | 200< | 0    | Negative | Negative | Negative |                                             |
| 67 | Thalangama         | 50   | 7    | 200< | 0    | Negative | Negative | Negative |                                             |
| 68 | Ederamulla         | 200< | 3    | 0    | 200< | Negative | Negative | Negative |                                             |
| 69 | IDH                | 5    | 0    | 200< | 0    | Negative | Negative | Negative |                                             |
| 70 | Nawagampura        | 200< | 100< | 0    | 0    | Negative | Negative | Negative |                                             |
| 71 | Mahawaththa        | 200< | 18   | 200< | 0    | Negative | Negative | Negative |                                             |
| 72 | Bangalawaththa     | 200< | 13   | 200< | 0    | Negative | Negative | Negative |                                             |

Table S5. Pathogenic bacteria in surface water sampling locations in the Kelani river basin (Dry season).

| Surface water                        | TC<br>(CFU/100mL) | FC<br>(CFU/100mL) | <i>Pseudomonas.spp.</i> |   |          | <i>Other Salmonella spp.</i> |          |          | <i>Campylobacter spp.</i> |  |  | <i>Shigella spp.</i> |  |  | <i>Pathogenic bacteria</i>                                  |  |  |
|--------------------------------------|-------------------|-------------------|-------------------------|---|----------|------------------------------|----------|----------|---------------------------|--|--|----------------------|--|--|-------------------------------------------------------------|--|--|
| 1 Kelani ganga (Nallathanniya)       | 200<              | 200<              | 0                       | 0 | Positive | Negative                     | Negative | Negative |                           |  |  |                      |  |  | <i>Salmonella enterica</i> serovar Kentucky                 |  |  |
| 2 Sami male canal                    | 200<              | 200<              | 0                       | 0 | Negative | Negative                     | Negative | Negative |                           |  |  |                      |  |  |                                                             |  |  |
| 3 Kehelgamu oya (Norwood)            | 200<              | 200<              | 0                       | 0 | Negative | Negative                     | Negative | Negative |                           |  |  |                      |  |  |                                                             |  |  |
| 4 Dic oya                            | 200<              | 200<              | 0                       | 0 | Negative | Negative                     | Negative | Negative |                           |  |  |                      |  |  |                                                             |  |  |
| 5 Maskeliya tank                     | 200<              | 6                 | 200<                    | 0 | Negative | Negative                     | Negative | Negative |                           |  |  |                      |  |  |                                                             |  |  |
| 6 Castlereigh tank                   | 200<              | 15                | 20                      | 0 | Negative | Negative                     | Negative | Negative |                           |  |  |                      |  |  |                                                             |  |  |
| 7 Norton tank                        | 200<              | 28                | 0                       | 0 | Negative | Negative                     | Negative | Negative |                           |  |  |                      |  |  |                                                             |  |  |
| 8 Kandura (Koththalanhena)           | 200<              | 200<              | 0                       | 0 | Positive | Negative                     | Negative | Negative |                           |  |  |                      |  |  | <i>Salmonella enterica</i> subsp. <i>diarizonae</i> Ser.61  |  |  |
| 9 Kelani ganga(Nagampitiya)          | 200<              | 55                | 0                       | 0 | Negative | Negative                     | Negative | Negative |                           |  |  |                      |  |  |                                                             |  |  |
| 10 Keselgamu oya (Tientsin)          | 200<              | 200<              | 0                       | 0 | Positive | Negative                     | Negative | Negative |                           |  |  |                      |  |  | <i>Salmonella enterica</i> serovar Javiana                  |  |  |
| 11 Mohini ella                       | 200<              | 200<              | 200<                    | 0 | Negative | Negative                     | Negative | Negative |                           |  |  |                      |  |  |                                                             |  |  |
| 12 Bokarabevila tributary            | 200<              | 200<              | 0                       | 0 | Negative | Negative                     | Negative | Negative |                           |  |  |                      |  |  |                                                             |  |  |
| 13 Vidulipura tributary              | 200<              | 200<              | 0                       | 0 | Negative | Negative                     | Negative | Negative |                           |  |  |                      |  |  |                                                             |  |  |
| 14 Alagal Oya (Gonagamuwa)           | 200<              | 200<              | 0                       | 0 | Positive | Negative                     | Negative | Negative |                           |  |  |                      |  |  | <i>Salmonella enterica</i> serovar Weltevreden              |  |  |
| 15 Ritigaha oya (Bulathkohupitiya)   | 200<              | 41                | 0                       | 0 | Negative | Positive                     | Negative | Negative |                           |  |  |                      |  |  | <i>Campylobacter</i> spp.                                   |  |  |
| 16 Kelani ganga (Yatyanthota)        | 200<              | 200<              | 0                       | 0 | Negative | Negative                     | Negative | Negative |                           |  |  |                      |  |  |                                                             |  |  |
| 17 We oya (Amanawala)                | 200<              | 44                | 0                       | 0 | Negative | Negative                     | Negative | Negative |                           |  |  |                      |  |  |                                                             |  |  |
| 18 Ritigaha oya (Warawala)           | 200<              | 200<              | 0                       | 0 | Negative | Negative                     | Negative | Negative |                           |  |  |                      |  |  |                                                             |  |  |
| 19 Gurugoda oya (Ruwanwella)         | 200<              | 200<              | 0                       | 0 | Positive | Negative                     | Negative | Negative |                           |  |  |                      |  |  | <i>Salmonella enterica</i> serovar Bareilly                 |  |  |
| 20 Kahanawita canal (Dehiovita)      | 200<              | 200<              | 0                       | 0 | Negative | Negative                     | Negative | Negative |                           |  |  |                      |  |  |                                                             |  |  |
| 21 Seethawaka oya (Thalduwa)         | 200<              | 200<              | 0                       | 0 | Negative | Negative                     | Negative | Negative |                           |  |  |                      |  |  |                                                             |  |  |
| 22 Eswaththa oya                     | 200<              | 200<              | 0                       | 0 | Positive | Negative                     | Negative | Negative |                           |  |  |                      |  |  | <i>Salmonella enterica</i> serovar Typhimurium              |  |  |
| 23 Pugoda oya (Pugoda)               | 200<              | 200<              | 0                       | 0 | Negative | Positive                     | Negative | Negative |                           |  |  |                      |  |  | <i>Campylobacter</i> spp.                                   |  |  |
| 24 Wak oya(Kaluaggala)               | 200<              | 200<              | 0                       | 0 | Negative | Negative                     | Negative | Negative |                           |  |  |                      |  |  |                                                             |  |  |
| 25 Kelani ganga (Thaligama)          | 200<              | 200<              | 0                       | 0 | Negative | Negative                     | Negative | Negative |                           |  |  |                      |  |  |                                                             |  |  |
| 26 Athalawa ela                      | 200<              | 200<              | 0                       | 0 | Negative | Negative                     | Negative | Negative |                           |  |  |                      |  |  |                                                             |  |  |
| 27 Getaheththa tributary             | 200<              | 200<              | 0                       | 0 | Positive | Negative                     | Negative | Negative |                           |  |  |                      |  |  | <i>Salmonella enterica</i> serovar Kentucky                 |  |  |
| 28 Amthirigala tributary             | 200<              | 200<              | 0                       | 0 | Negative | Negative                     | Negative | Negative |                           |  |  |                      |  |  |                                                             |  |  |
| 29 Pugada river (Mandawala)          | 200<              | 200<              | 200<                    | 0 | Positive | Negative                     | Negative | Negative |                           |  |  |                      |  |  | <i>Salmonella enterica</i> serovar Paratyphi B Variety Java |  |  |
| 30 Pusseli Oya (Wewelpanawa)         | 200<              | 200<              | 0                       | 0 | Negative | Negative                     | Negative | Negative |                           |  |  |                      |  |  |                                                             |  |  |
| 31 Pusseli Oya                       | 200<              | 200<              | 0                       | 0 | Negative | Negative                     | Negative | Negative |                           |  |  |                      |  |  |                                                             |  |  |
| 32 Kelani ganga (Ranala)             | 200<              | 200<              | 0                       | 0 | Negative | Negative                     | Negative | Negative |                           |  |  |                      |  |  |                                                             |  |  |
| 33 Pahala bomariya ela               | 200<              | 200<              | 0                       | 0 | Negative | Negative                     | Negative | Negative |                           |  |  |                      |  |  |                                                             |  |  |
| 34 Raggahawaththa oya                | 200<              | 70                | 0                       | 0 | Negative | Negative                     | Negative | Negative |                           |  |  |                      |  |  |                                                             |  |  |
| 35 Kelani ganga (Kohila waththa)     | 200<              | 34                | 0                       | 0 | Negative | Negative                     | Negative | Negative |                           |  |  |                      |  |  |                                                             |  |  |
| 36 Sebastian canal (Kelanihissa)     | 200<              | 200<              | 0                       | 0 | Positive | Negative                     | Negative | Negative |                           |  |  |                      |  |  | <i>Salmonella enterica</i> serovar Stanley                  |  |  |
| 37 Dutch canal                       | 200<              | 200<              | 0                       | 0 | Negative | Negative                     | Negative | Negative |                           |  |  |                      |  |  |                                                             |  |  |
| 38 Hamilton canal                    | 200<              | 200<              | 0                       | 0 | Negative | Positive                     | Negative | Negative |                           |  |  |                      |  |  | <i>Campylobacter</i> spp.                                   |  |  |
| 39 Kelani ganga (Mattakkuliya)       | 200<              | 200<              | 0                       | 0 | Negative | Negative                     | Negative | Negative |                           |  |  |                      |  |  |                                                             |  |  |
| 40 Raggahawaththa oya (Meegawaththa) | 200<              | 200<              | 50                      | 0 | Positive | Negative                     | Negative | Negative |                           |  |  |                      |  |  | <i>Salmonella enterica</i> serovar Newport                  |  |  |
| 41 Thalagama lake                    | 200<              | 200<              | 0                       | 0 | Positive | Negative                     | Negative | Negative |                           |  |  |                      |  |  | <i>Salmonella enterica</i> serovar Manchester               |  |  |
| 42 Diyawanna oya                     | 200<              | 80                | 40                      | 0 | Positive | Negative                     | Negative | Negative |                           |  |  |                      |  |  | <i>Salmonella enterica</i> serovar Litchfield               |  |  |

|    |                                   |      |      |   |   |          |          |          |                                                                                                                                    |
|----|-----------------------------------|------|------|---|---|----------|----------|----------|------------------------------------------------------------------------------------------------------------------------------------|
| 43 | Mahara                            | 200< | 200< | 0 | 0 | Positive | Negative | Negative | <i>Salmonella enterica</i> subsp <i>enterica</i> ser 4,[5],12:b/ <i>Salmonella enterica</i> subsp <i>enterica</i> ser 9,[12]:-:1,5 |
| 44 | Kiththampahuwa oya (Wellampitiya) | 200< | 200< | 0 | 0 | Positive | Negative | Negative | <i>Salmonella enterica</i> serovar Kentucky                                                                                        |
| 45 | Kalu oya                          | 200< | 200< | 0 | 0 | Positive | Negative | Negative | <i>Salmonella enterica</i> serovar Kentucky                                                                                        |

Table S6. Pathogenic bacteria in surface water sampling locations in the Kelani river basin (wet season).

|    | Surface water                   | TC (CFU/100mL) | FC (CFU/100mL) | <i>Pseudomonas</i> .spp. | Other | <i>Salmonella</i> spp. | <i>Campylobacter</i> spp. | <i>Shigella</i> spp. | Pathogenic bacteria                                                |
|----|---------------------------------|----------------|----------------|--------------------------|-------|------------------------|---------------------------|----------------------|--------------------------------------------------------------------|
| 1  | Kelani ganga (Nallathanniya)    | 200<           | 200<           | 0                        | 0     | Negative               | Negative                  | Negative             |                                                                    |
| 2  | Sami male canal                 | 200<           | 200<           | 0                        | 0     | Negative               | Negative                  | Negative             |                                                                    |
| 3  | Kehelegamu oya (Norwood)        | 200<           | 200<           | 0                        | 0     | Negative               | Negative                  | Negative             |                                                                    |
| 4  | Dic oya                         | 200<           | 200<           | 0                        | 0     | Negative               | Negative                  | Negative             |                                                                    |
| 5  | Maskeliya tank                  | 10             | 4              | 200<                     | 3     | Negative               | Negative                  | Negative             |                                                                    |
| 6  | Castlereigh tank                | 4              | 2              | 200<                     | 1     | Negative               | Negative                  | Negative             |                                                                    |
| 7  | Norton tank                     | 26             | 0              | 200<                     | 2     | Negative               | Negative                  | Negative             |                                                                    |
| 8  | Kandura (Koththalanhena)        | 200<           | 200<           | 0                        | 0     | Positive               | Negative                  | Negative             | <i>Salmonella enterica</i> subsp. <i>diarizonae</i> str. 61 z52z53 |
| 9  | Kelani ganga(Nagampitiya)       | 200<           | 200<           | 0                        | 0     | Negative               | Negative                  | Negative             |                                                                    |
| 10 | Keselgamu oya (Tientsin)        | 200<           | 200<           | 0                        | 0     | Negative               | Negative                  | Negative             |                                                                    |
| 11 | Mohini ella                     | 200<           | 200<           | 0                        | 0     | Negative               | Negative                  | Negative             |                                                                    |
| 12 | Bokarabevila tributary          | 200<           | 200<           | 200<                     | 200<  | Positive               | Negative                  | Negative             | <i>Salmonella enterica</i> subsp <i>enterica</i> ser 9,[12]:-:1,5  |
| 13 | Vidulipura tributary            | 200<           | 200<           | 0                        | 0     | Positive               | Negative                  | Negative             | <i>Salmonella enterica</i> serovar Typhimurium                     |
| 14 | Alagal Oya (Gonagamuwa)         | 200<           | 200<           | 0                        | 0     | Positive               | Negative                  | Negative             | <i>Salmonella enterica</i> serovar Typhimurium                     |
| 15 | Ritigaha oya (Bulathkohupitiya) | 200<           | 200<           | 0                        | 0     | Negative               | Negative                  | Negative             |                                                                    |
| 16 | Kelani ganga (Yatyanthota)      | 200<           | 200<           | 0                        | 0     | Negative               | Negative                  | Negative             |                                                                    |
| 17 | We oya (Amanawala)              | 200<           | 200<           | 0                        | 0     | Negative               | Negative                  | Negative             |                                                                    |
| 18 | Ritigaha oya (Warawala)         | 200<           | 200<           | 0                        | 0     | Negative               | Negative                  | Negative             |                                                                    |
| 19 | Gurugoda oya (Ruwanwella)       | 200<           | 200<           | 0                        | 0     | Negative               | Negative                  | Negative             |                                                                    |
| 20 | Kahanawita canal (Dehiovita)    | 200<           | 200<           | 0                        | 0     | Negative               | Negative                  | Negative             |                                                                    |
| 21 | Seethawaka oya (Thalduwa)       | 200<           | 200<           | 0                        | 0     | Positive               | Negative                  | Negative             | <i>Salmonella enterica</i> serovar Kentucky                        |
| 22 | Eswaththa oya                   | 200<           | 200<           | 0                        | 0     | Positive               | Negative                  | Negative             | <i>Salmonella enterica</i> serovar Kentucky                        |
| 23 | Pugoda oya (Pugoda)             | 200<           | 200<           | 0                        | 0     | Negative               | Negative                  | Negative             |                                                                    |
| 24 | Wak oya(Kaluaggala)             | 200<           | 200<           | 0                        | 0     | Positive               | Negative                  | Negative             | <i>Salmonella enterica</i> serovar Javiana                         |
| 25 | Kelani ganga (Thaligama)        | 200<           | 200<           | 0                        | 0     | Positive               | Negative                  | Negative             | <i>Salmonella enterica</i> serovar Paratyphi B Variety Java        |
| 26 | Athalawa ela                    | 200<           | 200<           | 0                        | 0     | Negative               | Negative                  | Negative             |                                                                    |
| 27 | Getaheththa tributary           | 200<           | 200<           | 0                        | 0     | Negative               | Negative                  | Negative             |                                                                    |
| 28 | Amthirigala tributary           | 200<           | 200<           | 0                        | 0     | Positive               | Negative                  | Negative             | <i>Salmonella enterica</i> serovar Bredeney                        |
| 29 | Pugada river (Mandawala)        | 200<           | 200<           | 200<                     | 0     | Positive               | Negative                  | Negative             | <i>Salmonella enterica</i> serovar Durban                          |
| 30 | Pusseli Oya (Wewelpanawa)       | 200<           | 200<           | 0                        | 0     | Positive               | Negative                  | Negative             | <i>Salmonella enterica</i> serovar Angola                          |
| 31 | Pusseli Oya                     | 200<           | 200<           | 0                        | 0     | Positive               | Negative                  | Negative             | <i>Salmonella enterica</i> serovar Paratyphi B Variety Java        |
| 32 | Kelani ganga (Ranala)           | 200<           | 200<           | 0                        | 0     | Positive               | Negative                  | Negative             | <i>Salmonella enterica</i> serovar Mount Pleasant                  |
| 33 | Pahala bomariya ela             | 200<           | 200<           | 0                        | 0     | Negative               | Negative                  | Negative             |                                                                    |
| 34 | Raggahawaththa oya              | 200<           | 200<           | 0                        | 0     | Positive               | Negative                  | Negative             | <i>Salmonella enterica</i> serovar Typhimurium                     |
| 35 | Kelani ganga (Kohila waththa)   | 200<           | 200<           | 0                        | 0     | Negative               | Negative                  | Negative             |                                                                    |
| 36 | Sebastian canal (Kelanithissa)  | 200<           | 200<           | 0                        | 0     | Positive               | Negative                  | Negative             | <i>Salmonella enterica</i> serovar Agona                           |
| 37 | Dutch canal                     | 200<           | 200<           | 0                        | 0     | Positive               | Negative                  | Negative             | <i>Salmonella enterica</i> serovar Enteritidis                     |
| 38 | Hamilton canal                  | 200<           | 200<           | 0                        | 0     | Negative               | Positive                  | Negative             | <i>Campylobacter</i> spp.                                          |

|    |                                   |      |      |      |   |          |          |          |                                                                           |
|----|-----------------------------------|------|------|------|---|----------|----------|----------|---------------------------------------------------------------------------|
| 39 | Kelani ganga (Mattakkuliya)       | 200< | 200< | 0    | 0 | Negative | Negative | Negative |                                                                           |
| 40 | Raggahawaththa oya (Meegawaththa) | 200< | 200< | 0    | 0 | Positive | Negative | Negative | <i>Salmonella enterica</i> serovar Weltevreden                            |
| 41 | Thalangama lake                   | 200< | 200< | 0    | 0 | Positive | Negative | Negative | <i>Salmonella enterica</i> serovar Paratyphi B Variety Java               |
| 42 | Diyawanna oya                     | 200< | 200< | 200< | 0 | Negative | Negative | Negative | <i>Salmonella enterica</i> serovar Typhimurium                            |
| 43 | Mahara                            | 200< | 100  | 0    | 0 | Negative | Negative | Negative |                                                                           |
| 44 | Kiththampahuwa oya (Wellampitiya) | 200< | 200< | 0    | 0 | Negative | Negative | Negative |                                                                           |
| 45 | Kalu oya                          | 200< | 200< | 0    | 0 | Positive | Positive | Negative | <i>Salmonella enterica</i> serovar Kentucky and <i>Campylobacter</i> spp. |
